# Supplementary material for: The Impact of Lytic Viruses on Bacterial Carbon Metabolism in a Temperate Freshwater Reservoir (Naussac, France)
Source: MDPI journal article supplement (doi:10.3390/applmicrobiol3040095), 2023-12-15

Figure S1. Variation in euphotic depth in Naussac reservoir during the studied period.

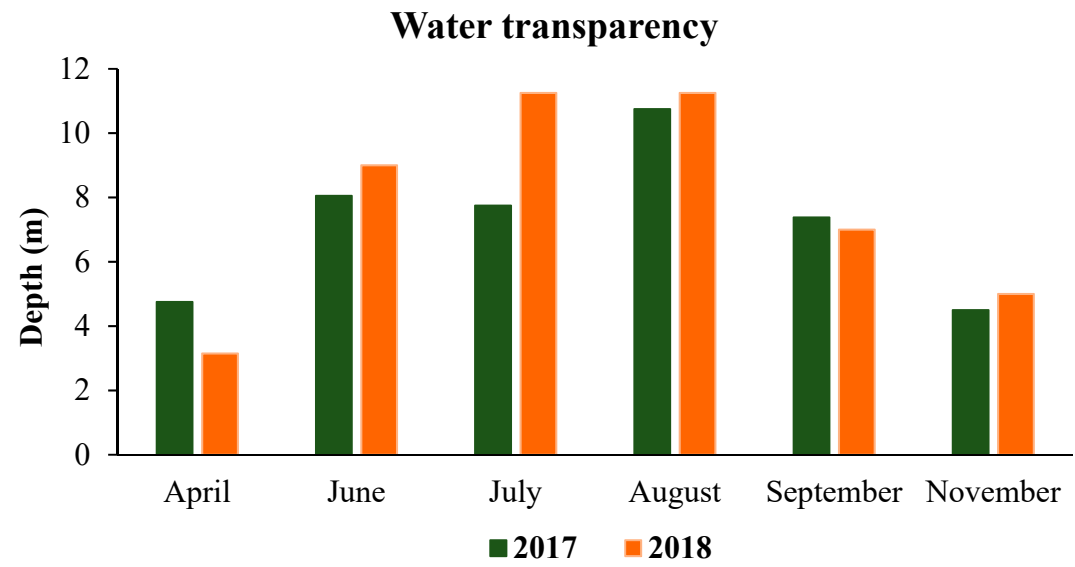

Figure S2. Vertical column profiles of water temperature and dissolved oxygen concentration at Naussac reservoir during the study period (2017 and 2018).

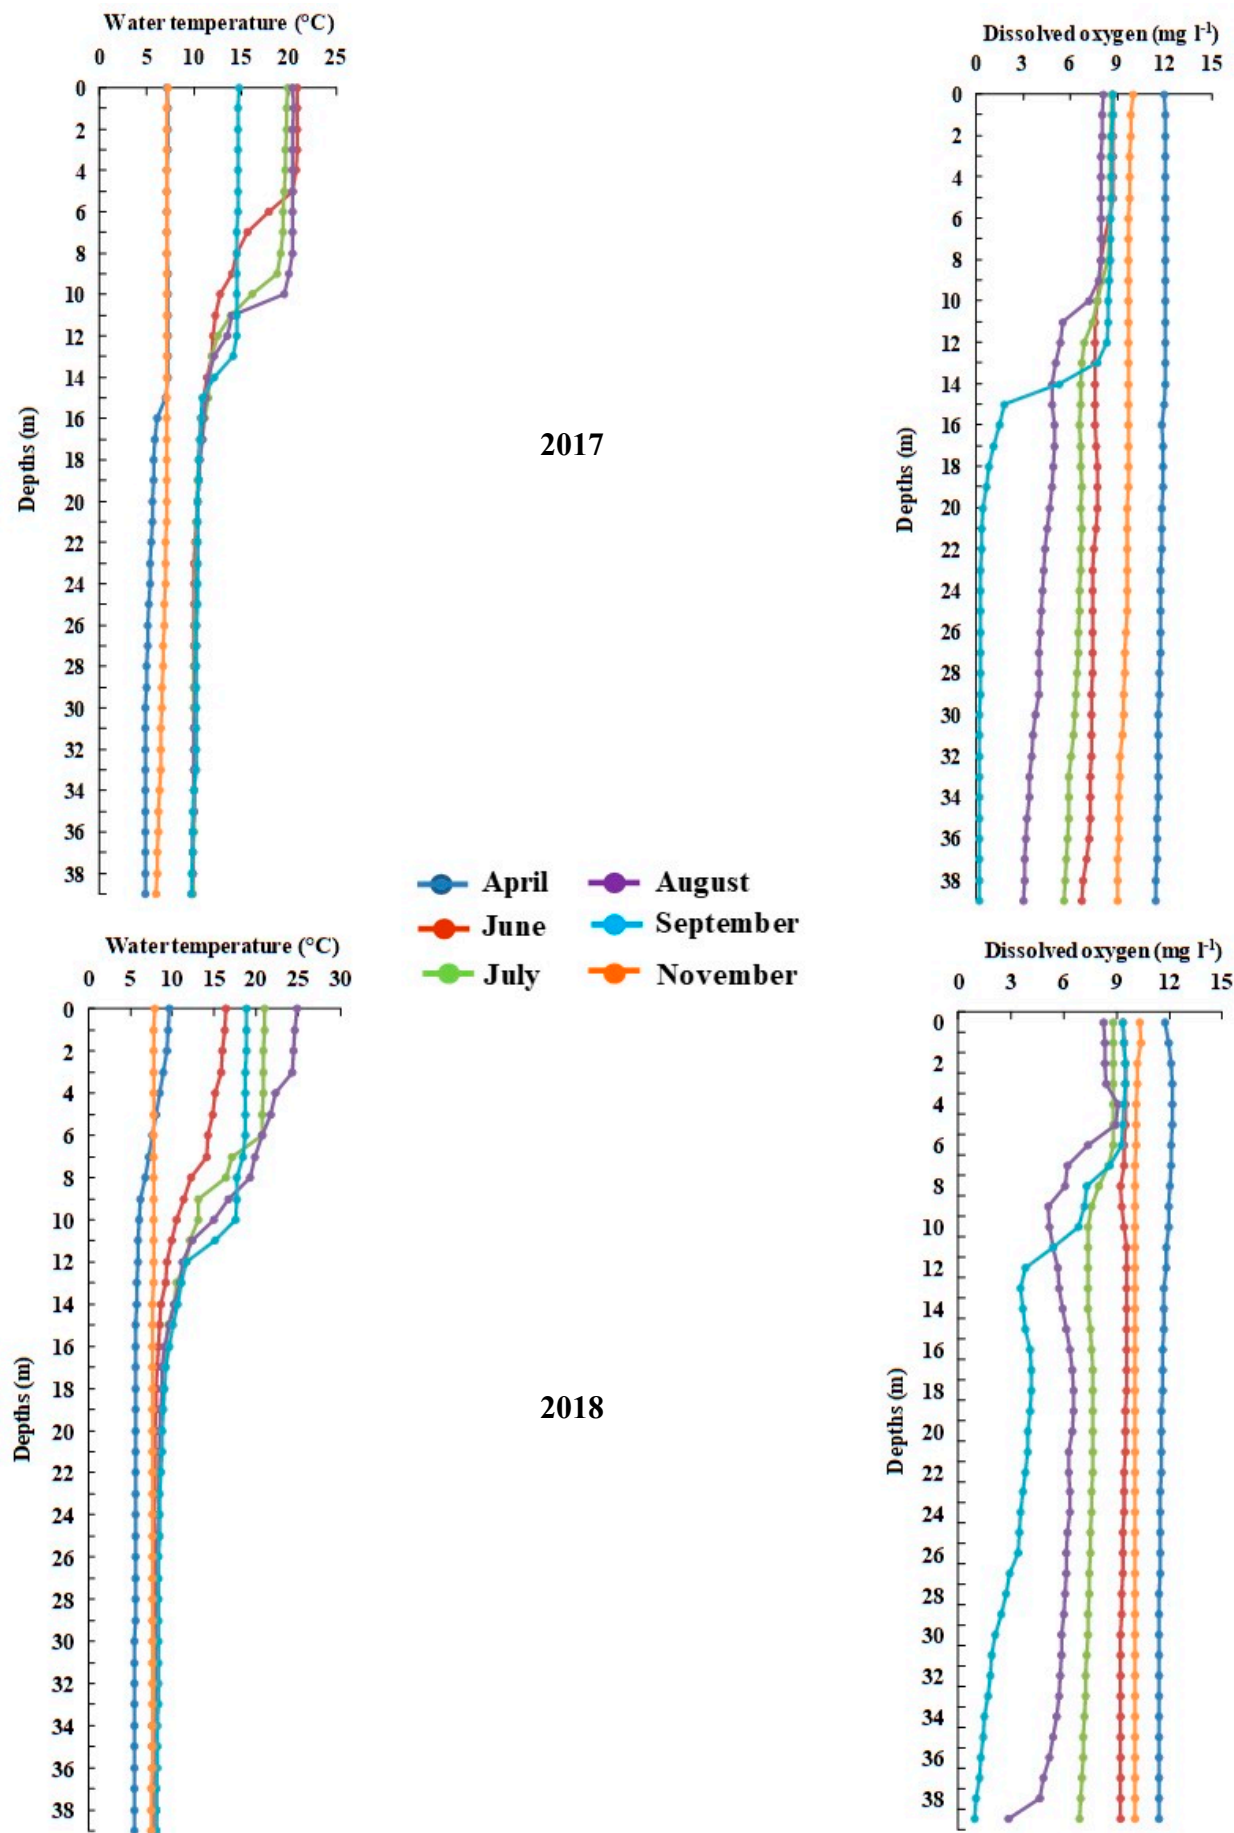

Figure S3. Regression analyses between bacterial and viral abundances in Naussac reservoir.

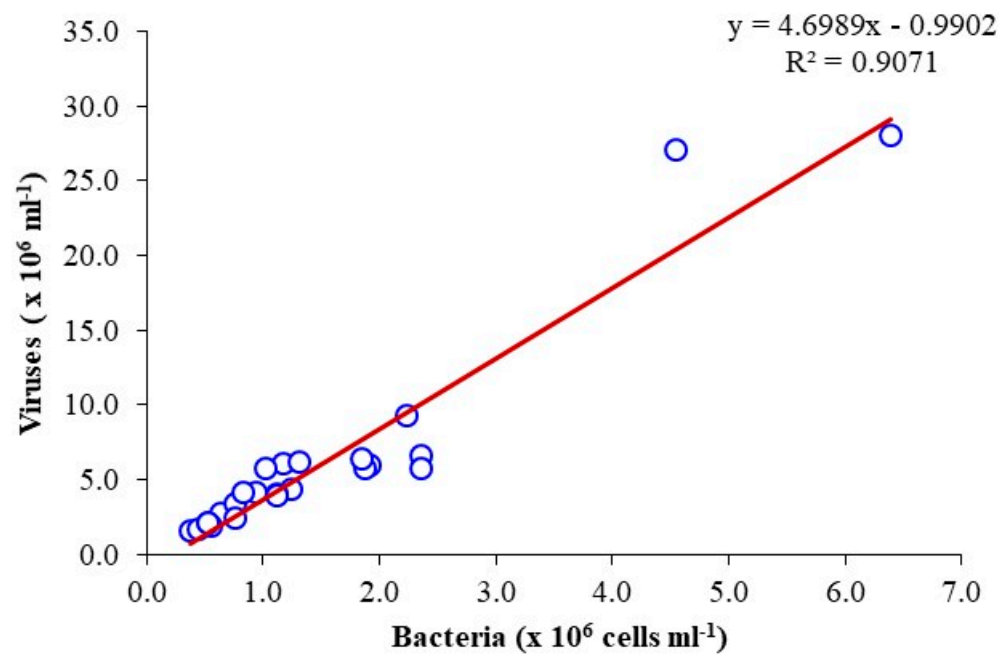

Figure S4. Regression analyses between C:P ratio and estimates of bacterial carbon metabolism (BCM %) in Naussac reservoir.

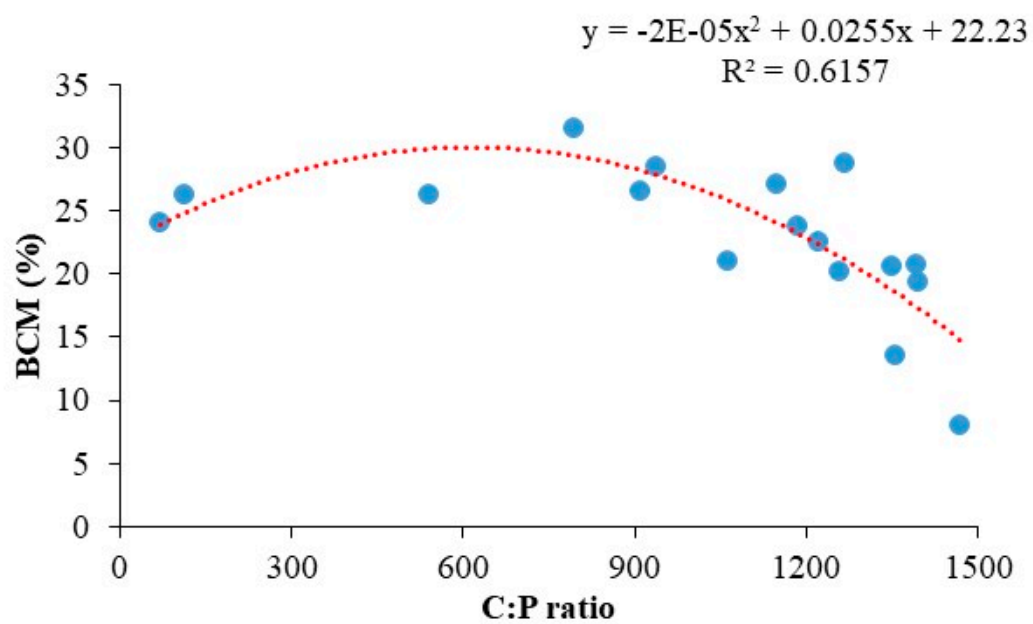

Supplement: s1 [file s1]
